# Supplementary material for: Facile modulation of different vacancies in ZnS nanoplates for efficient solar fuel production
Source: Royal Society of Chemistry journal article supplement (doi:10.1039/d0ta12400a), 2021-01-01
Supplement: d0ta12400a1.pdf [file d0ta12400a1.pdf]

Electronic Supplementary Information (ESI) for Journal of Materials Chemistry A

This journal is © The Royal Society of Chemistry 2020

## **Facile modulation of different vacancies in ZnS nanoplates for efficient solar fuel production**

Pan Li, <sup>a,b</sup> Lingju Guo, <sup>a</sup> Shuangming Chen, <sup>c</sup> Gan Luo, <sup>b</sup> Shuang Zhu, <sup>a,d</sup> Yanjie Wang, <sup>a</sup> Li Song <sup>\*c</sup> and Tao He<sup>\*a,d</sup>

<sup>a</sup> CAS Key Laboratory of Nanosystem and Hierarchical Fabrication, CAS Center for Excellence in Nanoscience, National Center for Nanoscience and Technology, Beijing 100190, China. E-mail: [het@nanoctr.cn](mailto:het@nanoctr.cn)

<sup>b</sup> Henan Engineering Center of New Energy Battery Materials, Henan D&A Engineering Center of Advanced Battery Materials, School of Chemistry and Chemical Engineering, Shangqiu Normal University, Shangqiu, Henan 476000, China

<sup>c</sup> National Synchrotron Radiation Laboratory, CAS Center for Excellence in Nanoscience, University of Science and Technology of China, Hefei, Anhui 230029, China. E-mail: [song2012@ustc.edu.cn](mailto:song2012@ustc.edu.cn)

<sup>d</sup> University of Chinese Academy of Sciences, Beijing 100049, China.

**Fig. S1.** TGA and DTG results of ZnS(en)<sub>0.5</sub> precursor measured in (a) Ar and (b) air atmosphere, respectively.

**Fig. S2.** (a) Raman and (b) FT-IR spectra of ZnS(en)<sub>0.5</sub>, ZnS-Ar and ZnS-Air samples, respectively.

**Fig. S3.** Solar fuel production over ZnS-Ar and ZnS-Air catalysts, respectively.

**Fig. S4.** XRD patterns of the ZnS samples before and after photoreduction experiments.

**Fig. S5.** High resolution XPS spectra of (a) Zn 2p and (b) S 2p of the ZnS samples after photoreduction experiments.

**Fig. S6.** SEM images of (a) ZnS-Ar and (b) ZnS-air samples after photoreduction experiments.

**Fig. S7.** EIS Nyquist plot of the samples before and after photoreduction experiments and the zoom-in spectra.

**Fig. S8.** Solar fuel production over ZnS-Ar sample for 8 h.

**Fig. S9.** EDX mapping of the ZnS samples prepared in Ar and air, respectively.

**Fig. S10.** XRD pattern of commercial ZnS used as reference sample, indicating it is Blende structure.

**Fig. S11.** SEM images of commercial ZnS used as reference sample.

**Fig. S12.** Distribution of pore size for ZnS-Ar (3.5±1.0 nm) and ZnS-Air (~2.0-15.0 nm) samples.

**Fig. S13.** PL spectra of the ZnS samples synthesized in Ar and air, respectively.

**Fig. S14.** Typical isotherms of (a) CO<sub>2</sub> adsorption and (b) N<sub>2</sub> adsorption-desorption for ZnS-Ar and ZnS-Air samples.

**Fig. S15.** Adsorption configurations of (a) CO, (b) H<sub>2</sub>O and (c) H<sub>2</sub> on the clean surface, V<sub>s</sub> defects and V<sub>Zn</sub>-V<sub>s</sub>-V<sub>Zn</sub> defects of ZnS, respectively.

**Fig. S16.** In-situ DRIFTS for CO<sub>2</sub> interactions with ZnS catalysts in the dark and under irradiation.

**Fig. S17.** In-situ DRIFTS for the interactions of intermediates formed during CO<sub>2</sub> photoreduction with ZnS catalysts in the dark and under irradiation.

**Fig. S18.** In-situ DRIFTS for H<sub>2</sub>O interactions with ZnS catalysts in the dark and under irradiation.

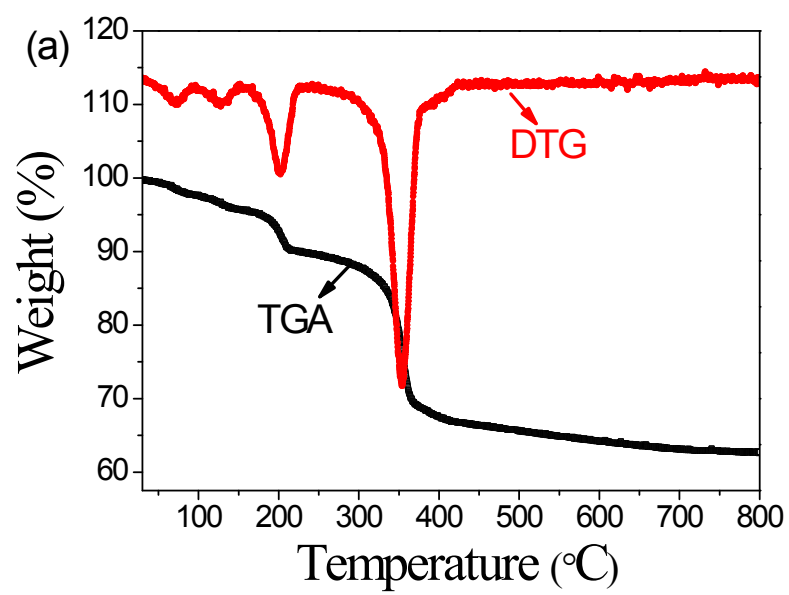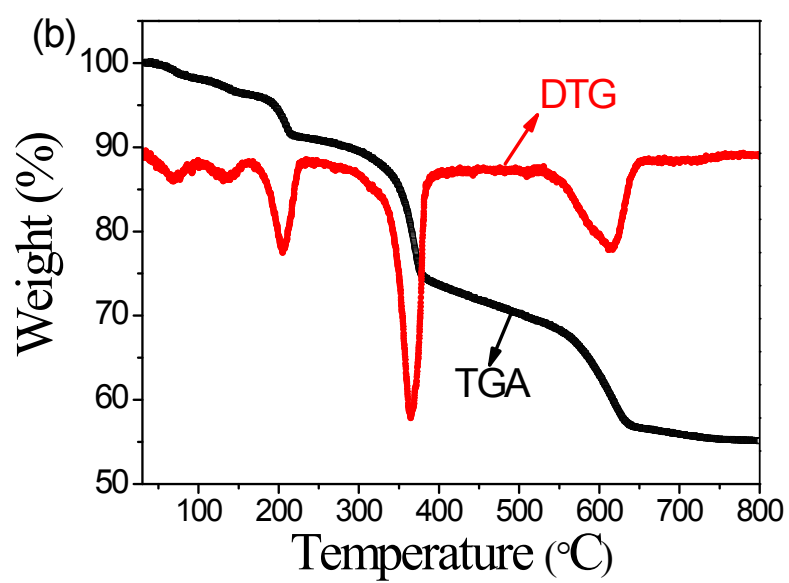

**Fig. S1.** TGA and DTG results of ZnS(en)<sub>0.5</sub> precursor measured in (a) Ar and (b) air atmosphere, respectively.

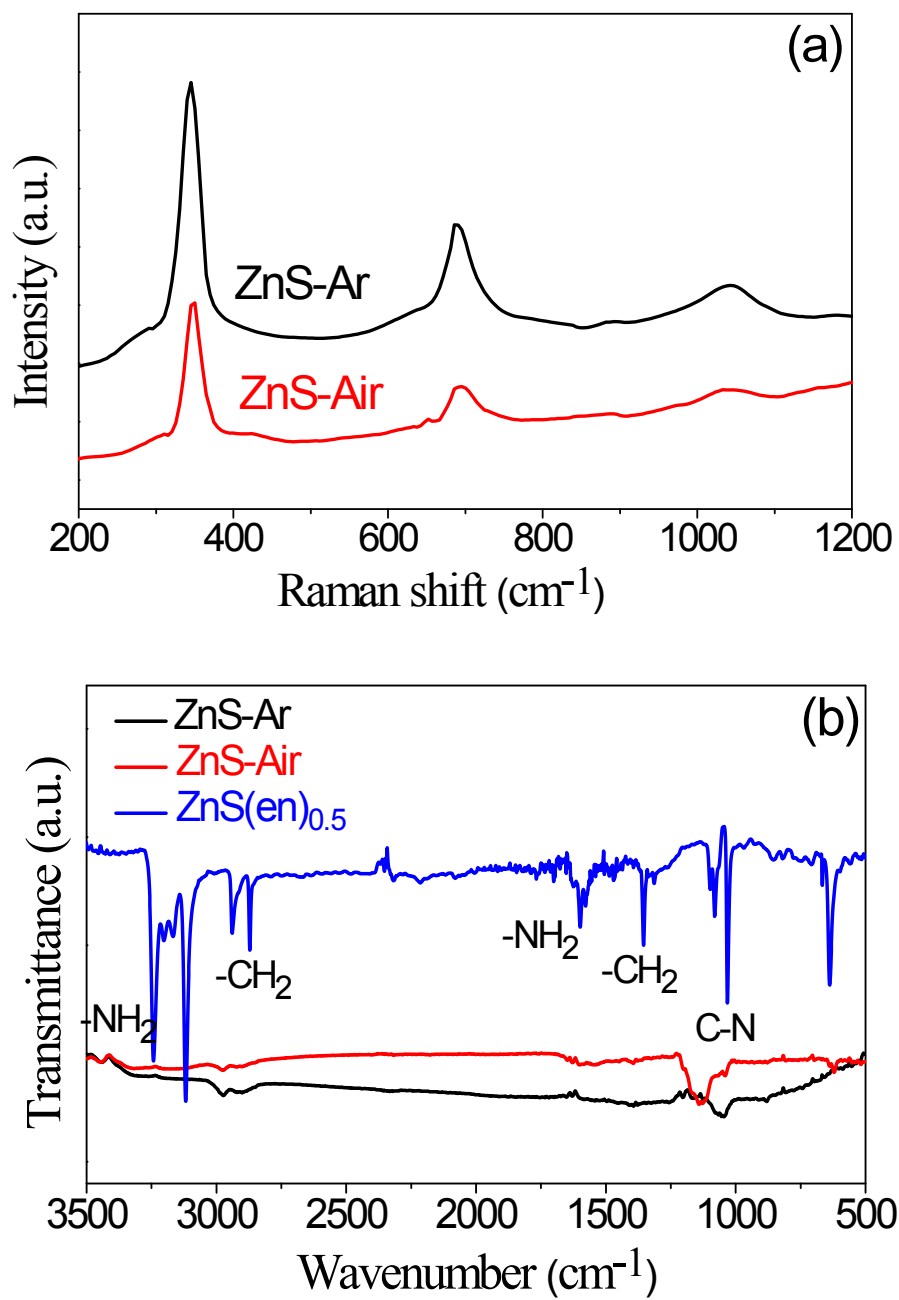

**Fig. S2.** (a) Raman and (b) FT-IR spectra of ZnS(en)<sub>0.5</sub>, ZnS-Ar and ZnS-Air samples, respectively.

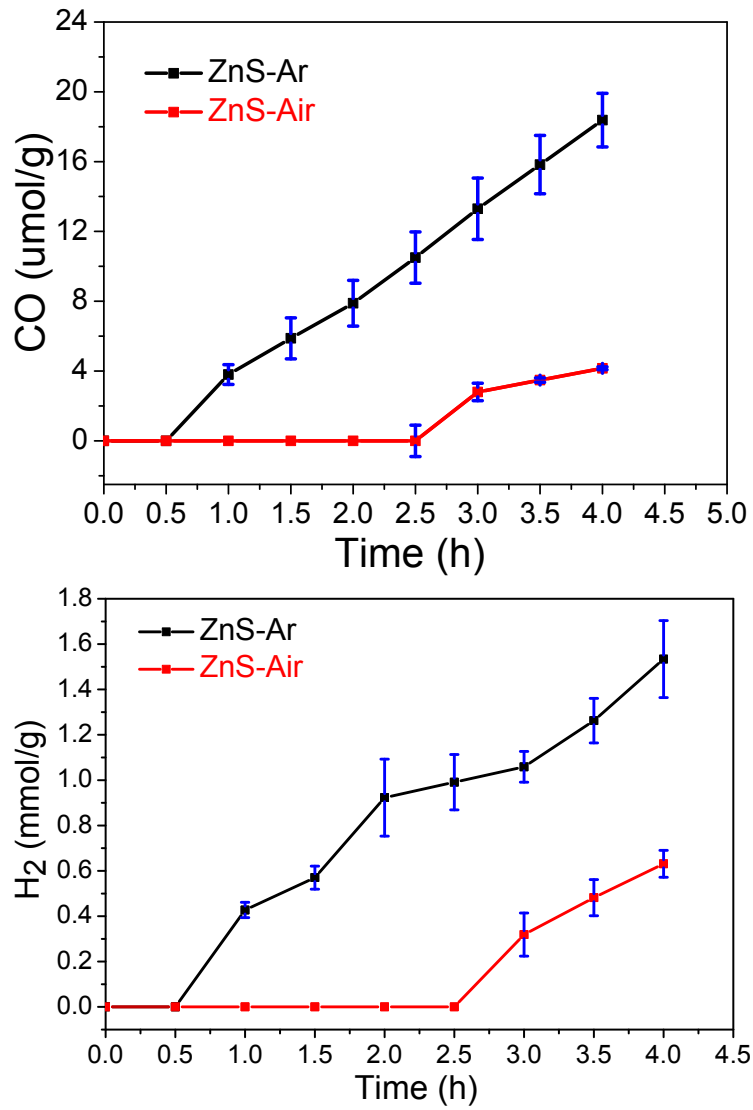

**Fig. S3.** Solar fuel production over ZnS-Ar and ZnS-Air catalysts, respectively.

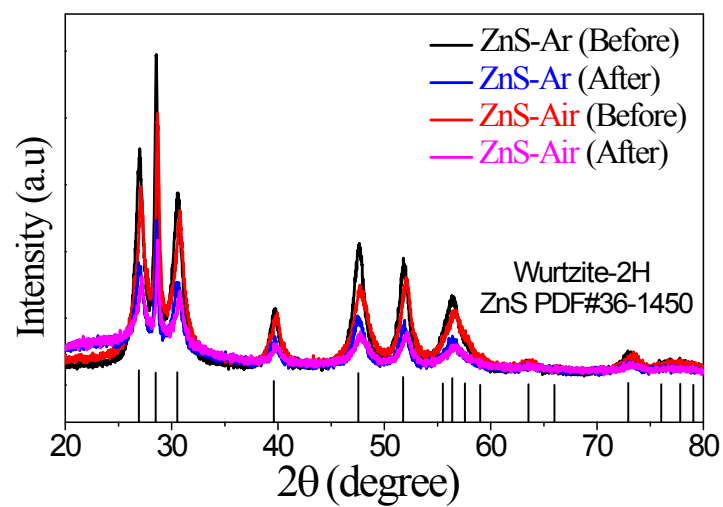

**Fig. S4.** XRD patterns of the ZnS samples before and after photoreduction experiments.

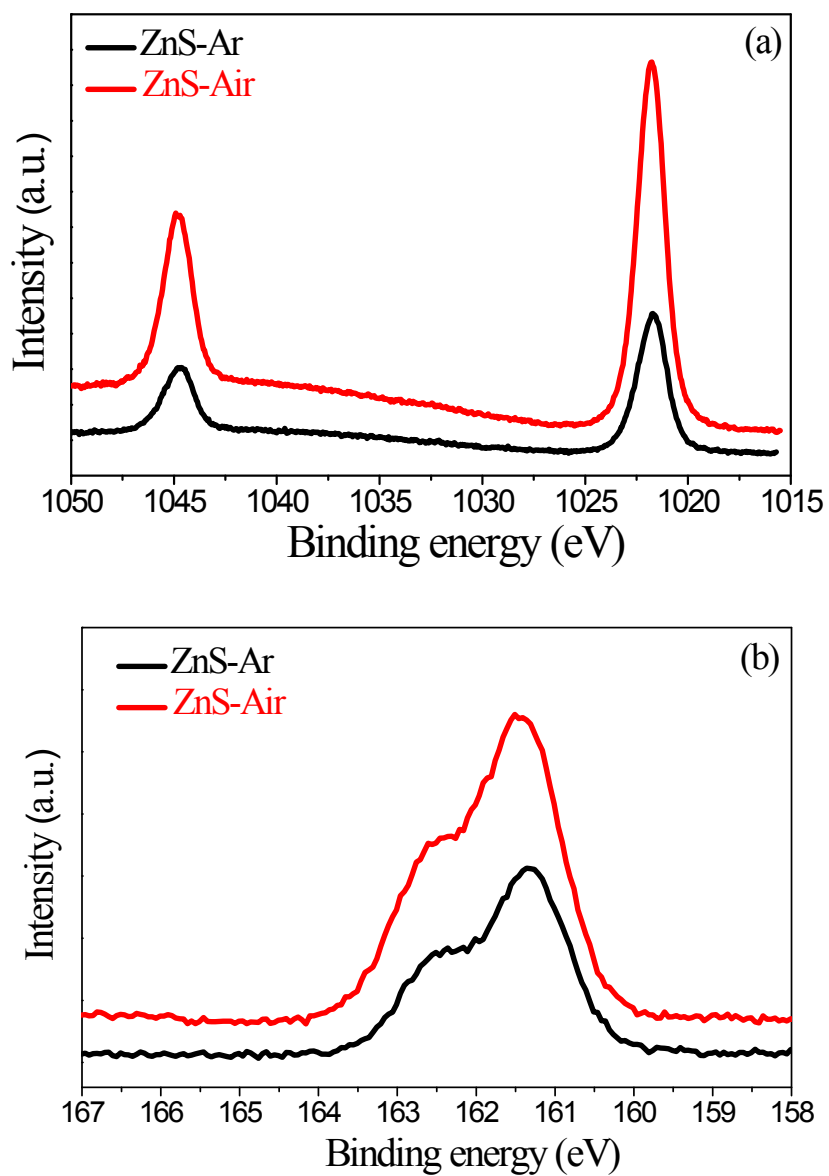

**Fig. S5.** High resolution XPS spectra of (a) Zn 2p and (b) S 2p of the ZnS samples after photoreduction experiments.

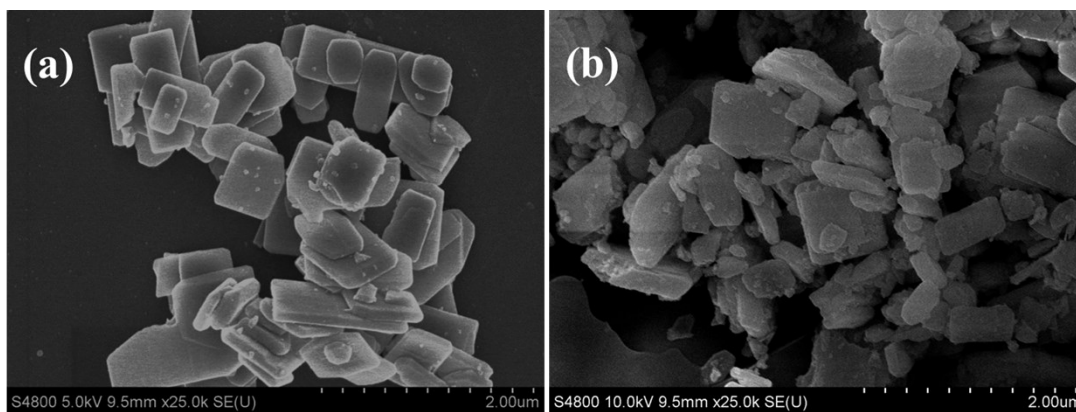

**Fig. S6.** SEM images of (a) ZnS-Ar and (b) ZnS-Air samples after photoreduction experiments.

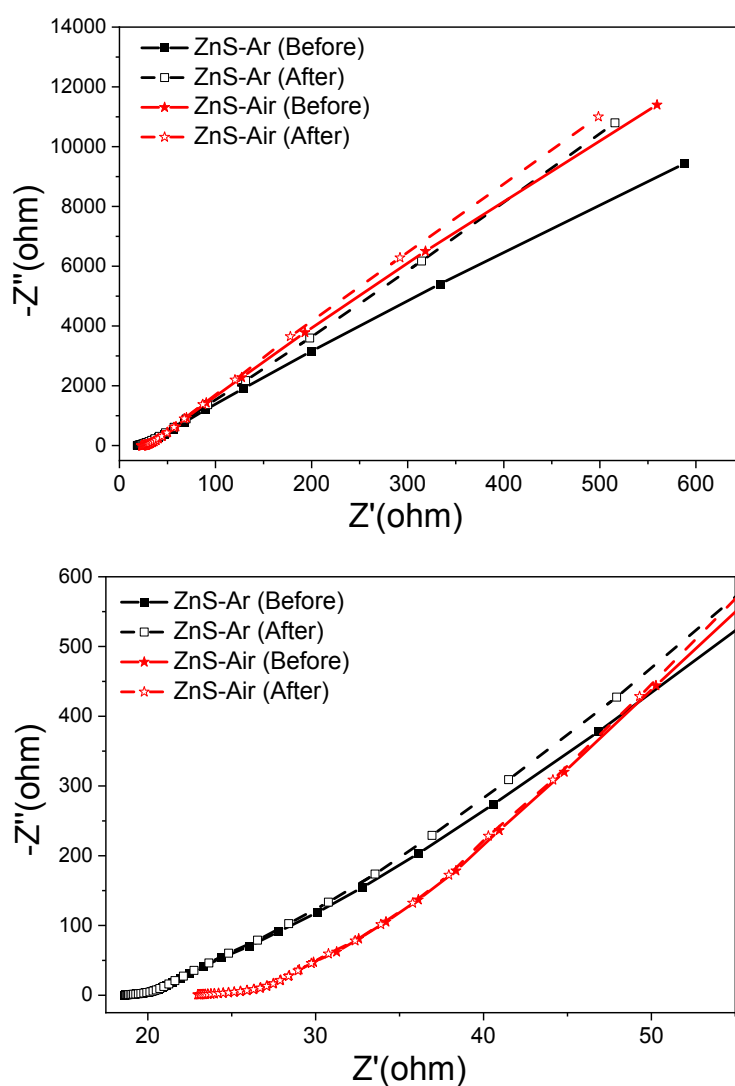

**Fig. S7.** (Top) EIS Nyquist plot of the samples before and after photoreduction experiments and (Bottom) the zoom-in spectra.

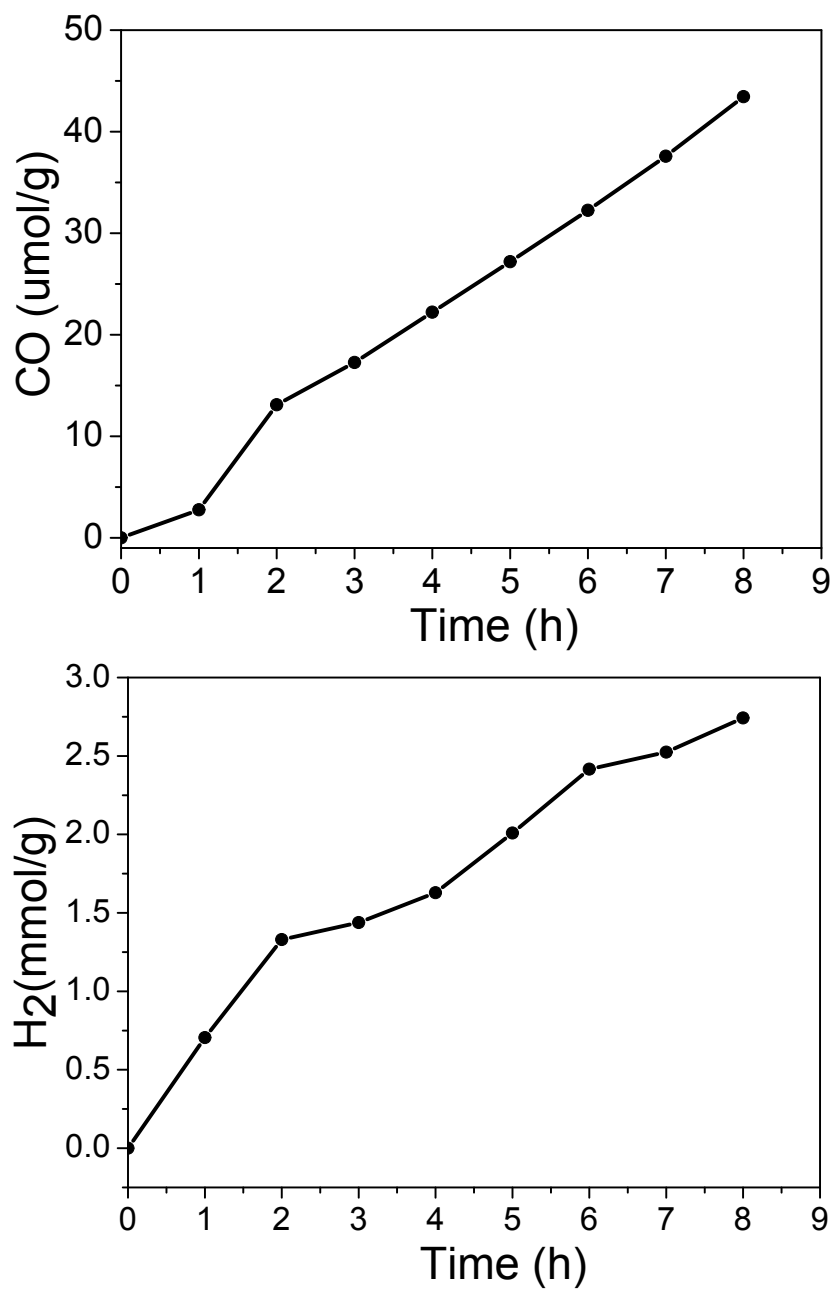

**Fig. S8.** Solar fuel production over ZnS-Ar sample for 8 h.



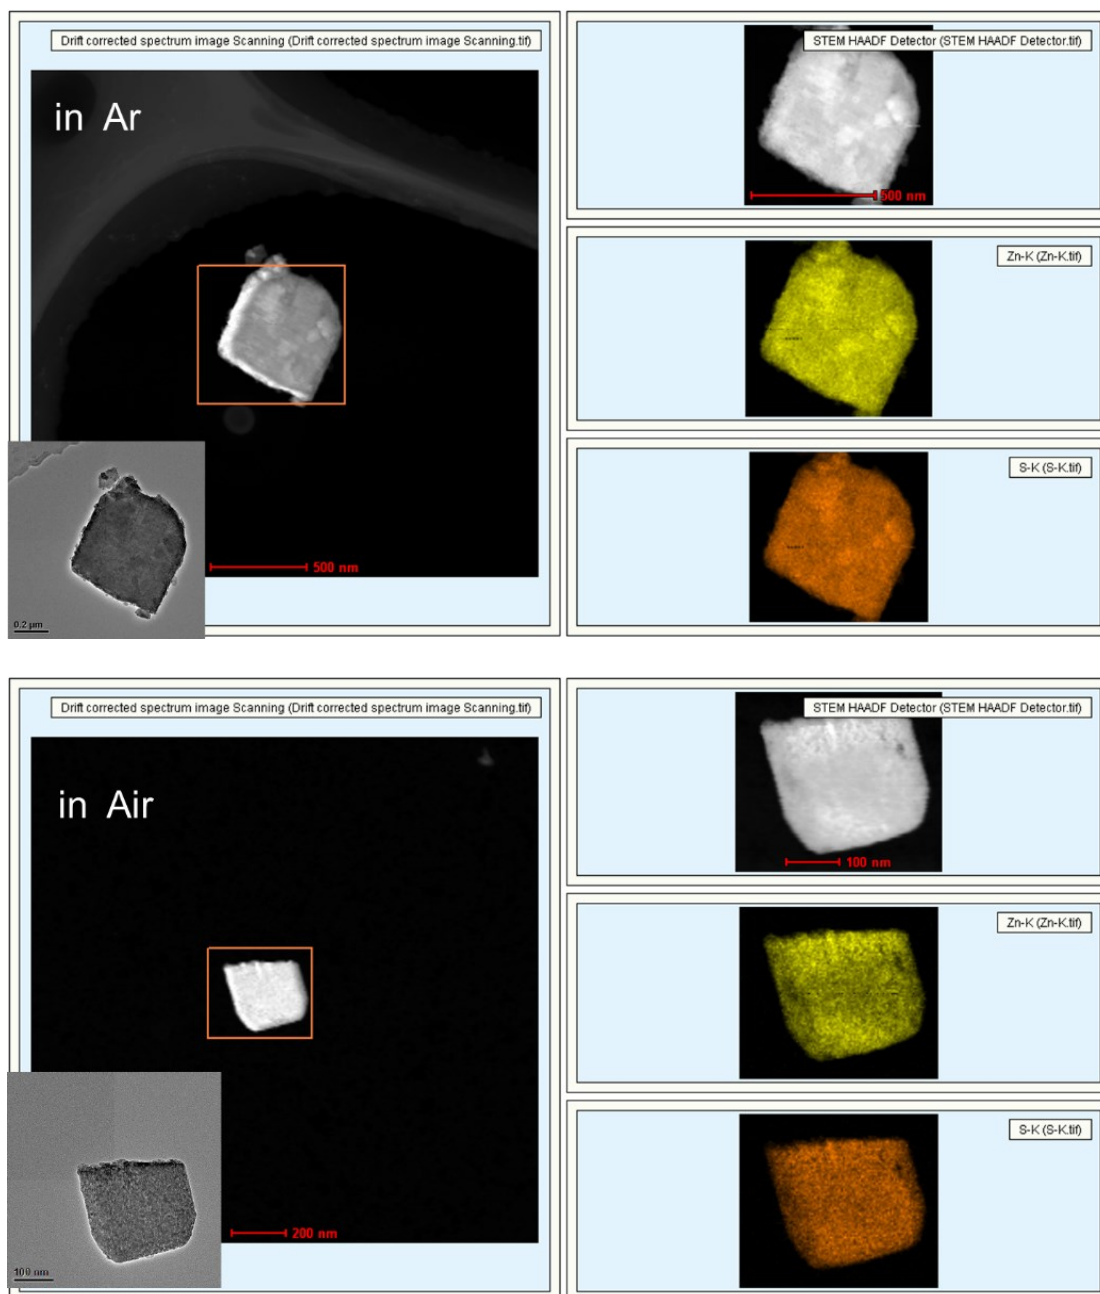

**Fig. S9.** EDX mapping of the ZnS samples prepared in Ar and air, respectively.

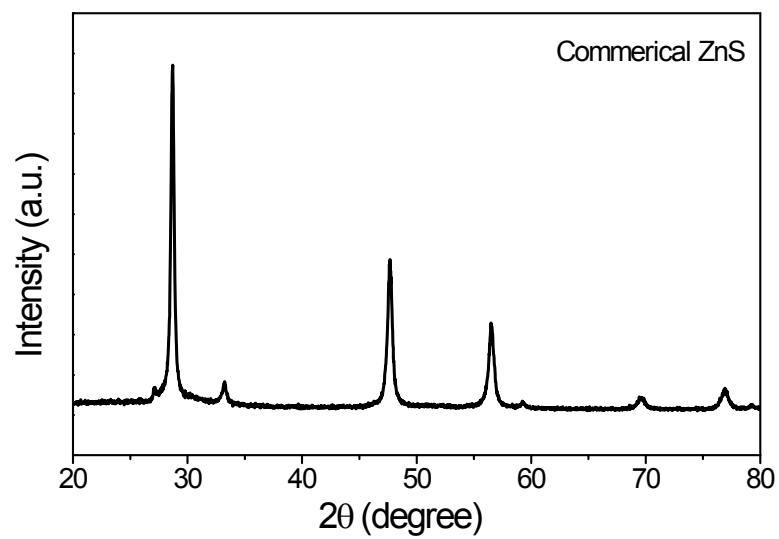

**Fig. S10.** XRD pattern of commercial ZnS used as reference sample, indicating it is Blende structure.

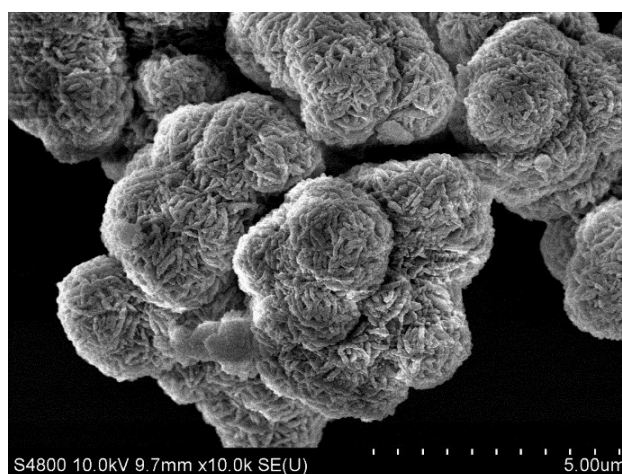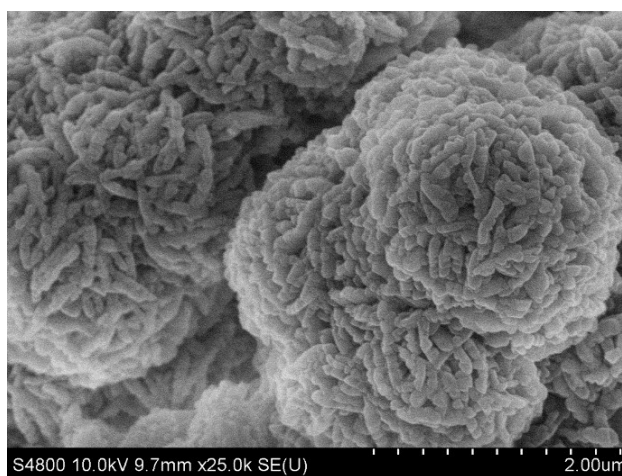

**Fig. S11.** SEM images of commercial ZnS used as reference sample.

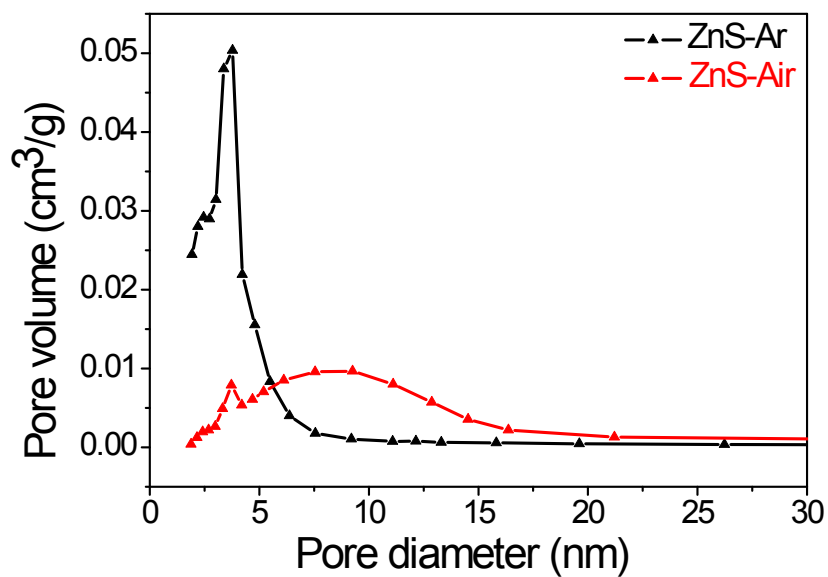

Fig. S12. Distribution of pore size for ZnS-Ar ( $3.5 \pm 1.0$  nm) and ZnS-Air ( $\sim 2.0$ - $15.0$  nm) samples.

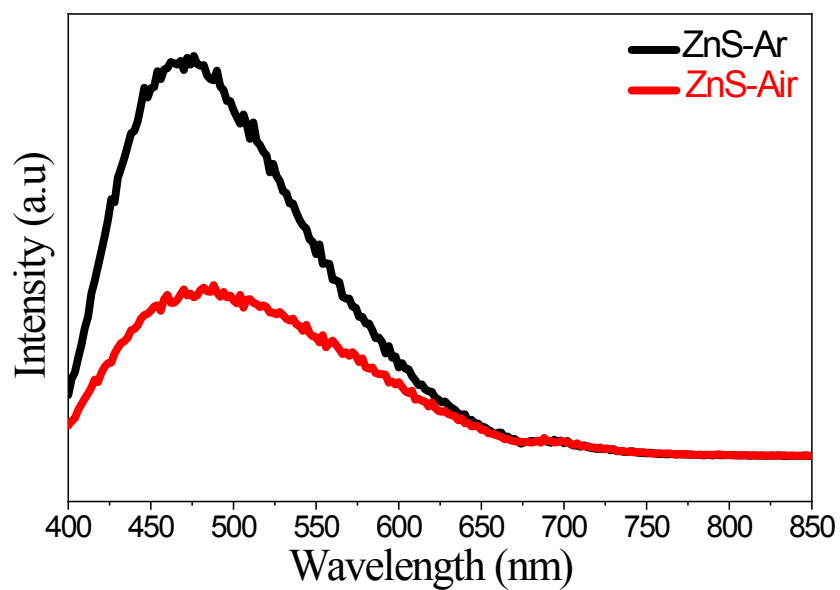

Fig. S13. PL spectra of the ZnS samples synthesized in Ar and air, respectively.

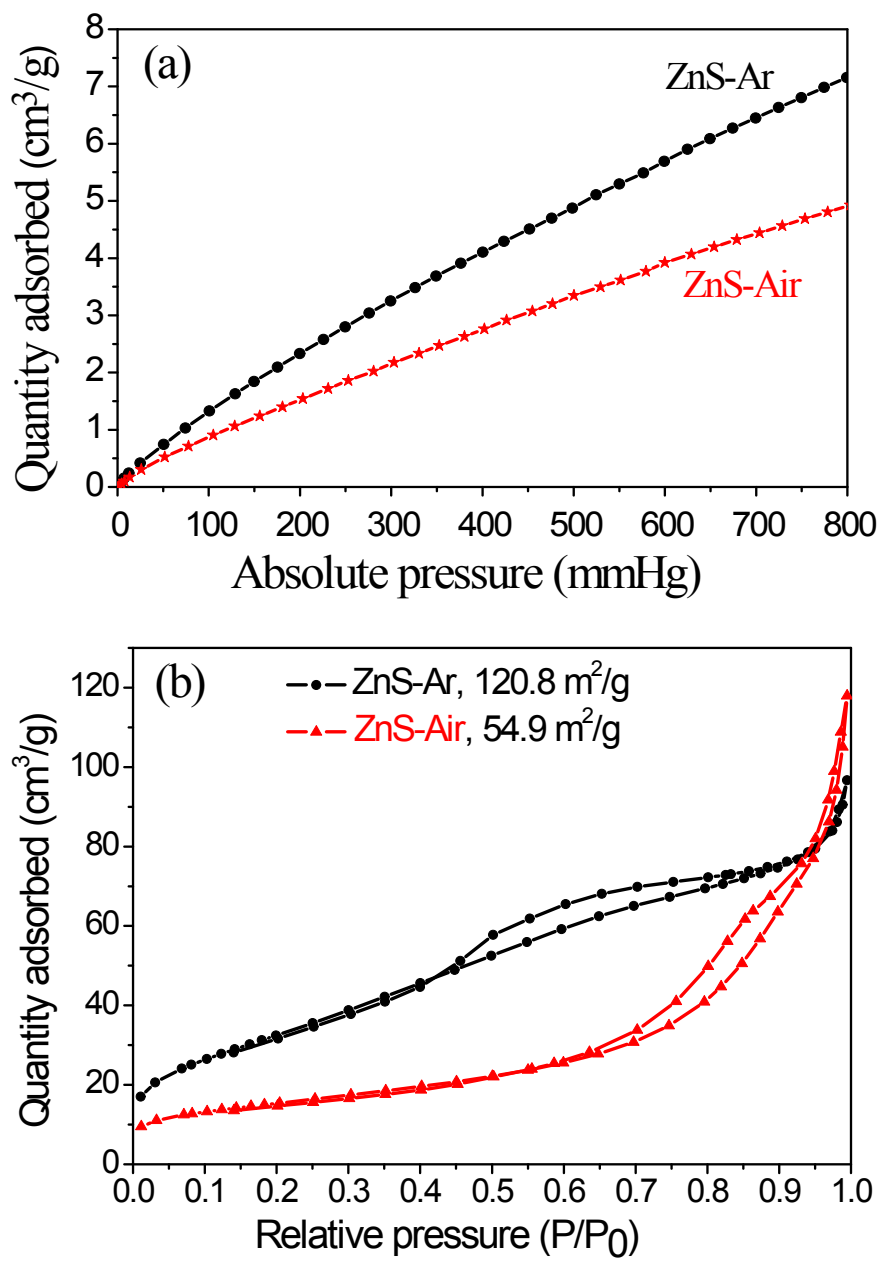

**Fig. S14.** Typical isotherms of (a) CO<sub>2</sub> adsorption and (b) N<sub>2</sub> adsorption-desorption for ZnS-Ar and ZnS-Air samples.

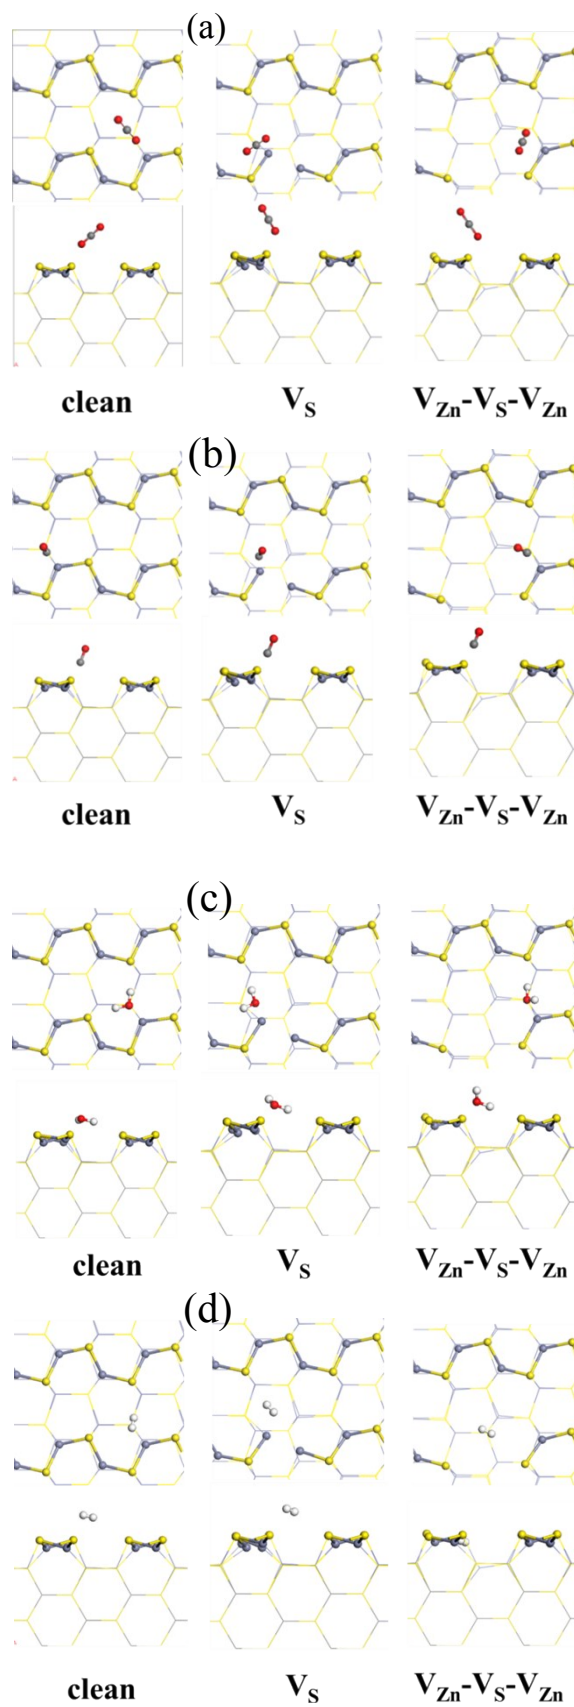

**Fig. S15.** Adsorption configurations of (a)  $CO_2$ , (b)  $CO$ , (c)  $H_2O$ , and (d)  $H_2$  on the clean surface,  $V_S$  defects, and  $V_{Zn}-V_S-V_{Zn}$  defects of ZnS, respectively.

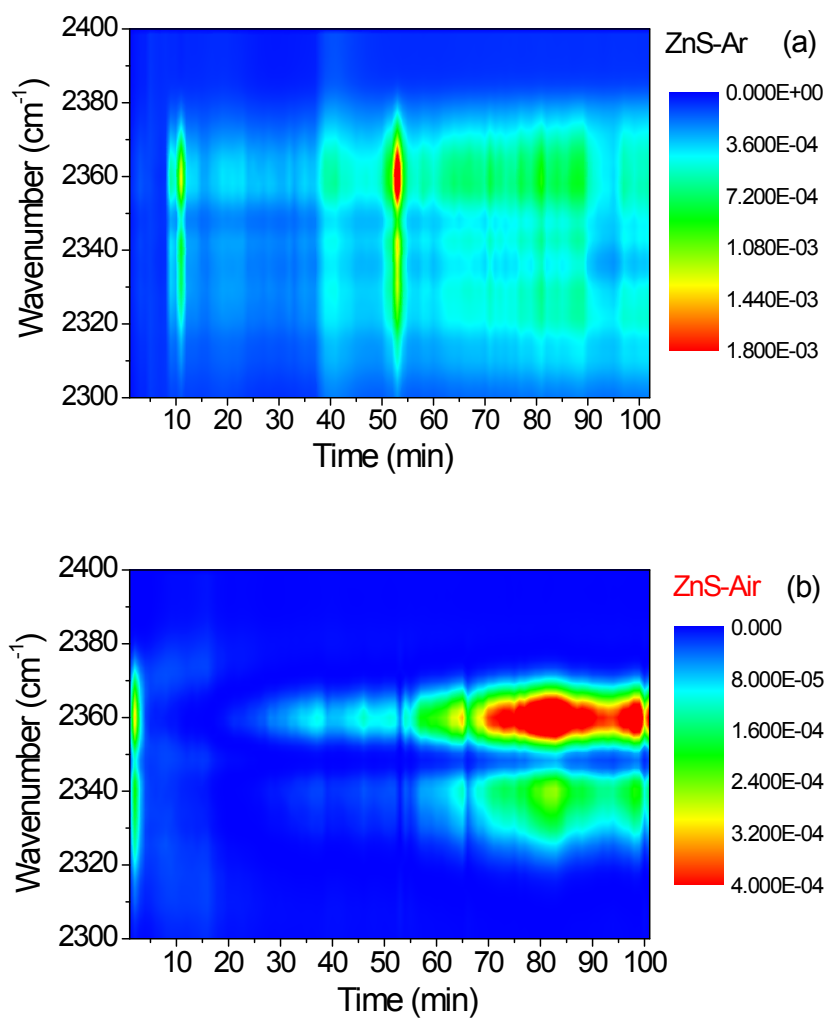

Fig. S16. In-situ DRIFTS for CO<sub>2</sub> interactions with ZnS catalysts in the dark and under irradiation.

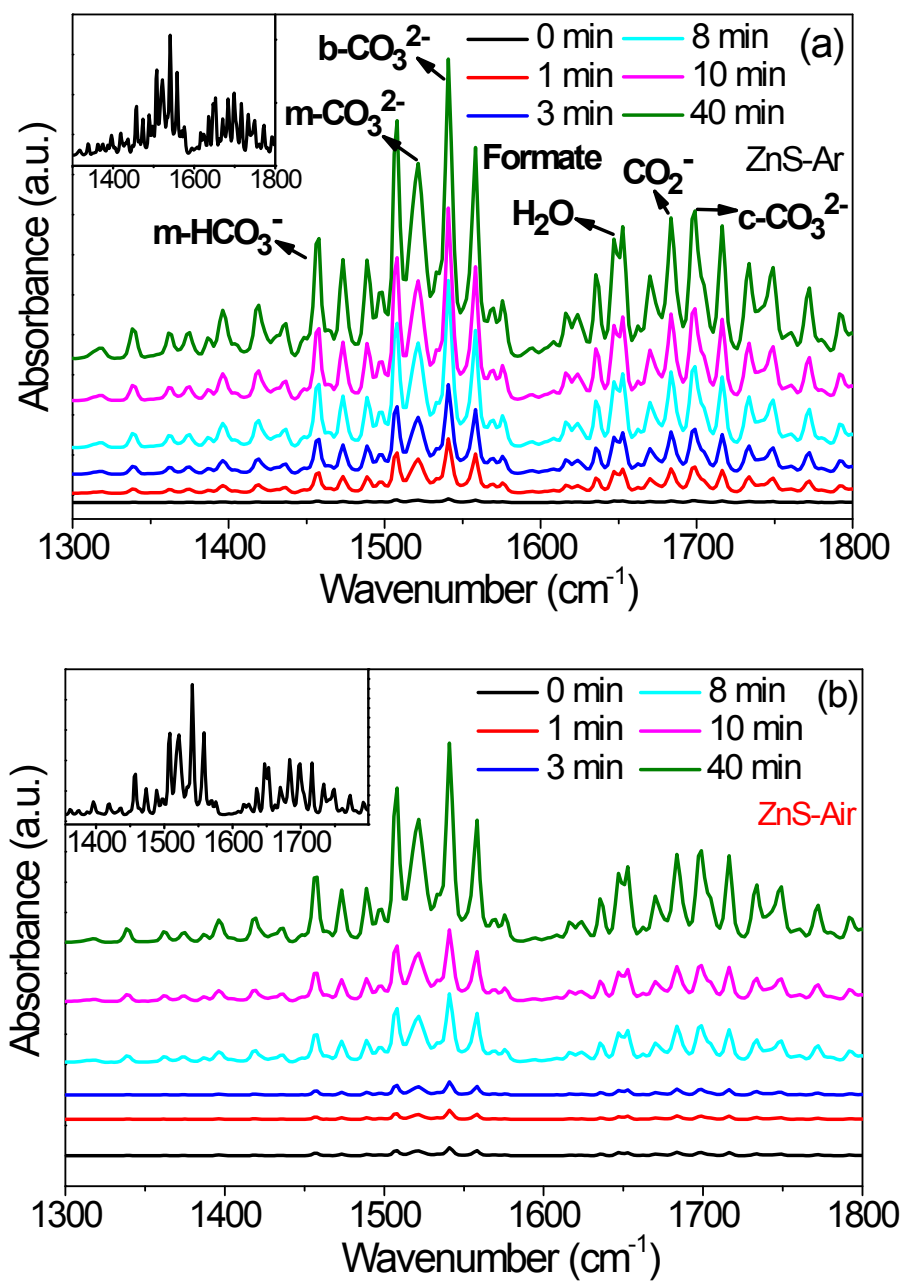

**Fig. S17.** In-situ DRIFTS for the interactions of intermediates formed during  $\text{CO}_2$  photoreduction with ZnS catalysts in the dark and under irradiation.

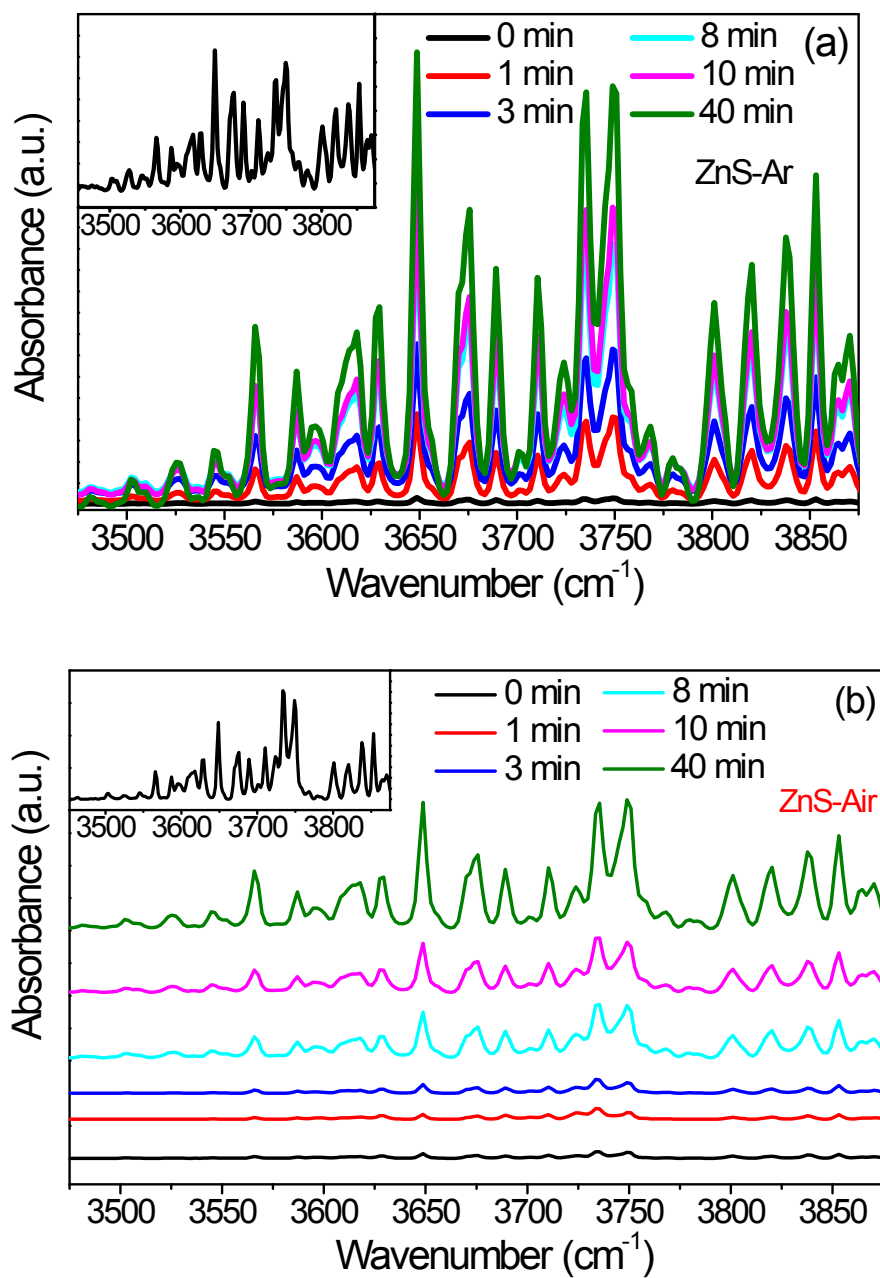

Fig. S18. In-situ DRIFTS for  $\text{H}_2\text{O}$  interactions with ZnS catalysts in the dark and under irradiation.
